# Supplementary material
Source: PubMed Central journal article supplement (PMC4071530)

# 1 Supporting Information

2 List of population IDs from the Global Population Dynamics Database for the time series used  
3 in this analysis.

4 1,8,9,10,11,12,13,14,15,16,17,18,56,57,58,59,60,61,1159,1160,1163,1166,1170,1174,1181,11  
5 85,1188,1189,1207,1235,1239,1347,1356,1357,1358,1359,1360,1361,1362,1363,1364,1365,1  
6 366,1367,1377,1403,1405,1505,1507,1508,1516,1517,1522,1526,1536,2726,2732,2733,2736,  
7 2737,2757,2758,2771,2774,2775,2778,2780,2781,5029,5032,5033,5034,5035,5036,5037,503  
8 8,5039,5040,5044,5045,5047,5049,5054,5055,6522,6527,6528,6529,6530,6531,6532,6533,65  
9 34,6535,6536,6537,6538,6633,6673,6674,6676,6677,6678,6688,7041,7042,7051,9200,9207,9  
10 211,9270,9271,9272,9273,9276,9277,9279,9280,9330,9331,9395,9400,9436,9437,9438,9439,  
11 9440,9441,9442,9443,9444,9445,9446,9447,9460,9506,9507,9715,9736,9793,9794,9795,979  
12 6,9797,9855,9856,9857,9858,9859,9860,9861,9862,9863,9864,9865,9866,9867,9868,9869,98  
13 70,9871,9872,9873,9874,9875,9876,9877,9878,9879,9880,9881,9882,9883,9884,9885,9886,9  
14 887,9888,9893,9896,9897,9898,9899,9901,9902,9903,9904,9907,3,5,6,7,1523,1524,6634,676  
15 4,6765,6863,6864,6865,6866,6867,6868,6869,6870,6871,6872,6873,6874,6875,6876,6877,68  
16 78,6879,6880,6881,6882,6883,6884,6885,6886,6887,6888,6889,6890,6891,6892,6893,6894,6  
17 895,6896,6897,6898,6899,6900,6901,6902,6903,6904,6905,6906,6907,6908,6909,6910,6911,  
18 6912,6913,6914,6915,6916,6917,6918,6919,6920,6921,6922,6923,6924,6925,6926,6927,692  
19 8,6929,6930,6931,6932,6933,6934,6935,6936,6937,6938,6939,6940,6941,6942,6943,6944,69  
20 45,6946,6947,6948,6949,6950,6951,6953,6955,6956,6957,6958,6959,6960,6961,6962,6963,6  
21 964,6965,6966,6967,6968,6970,6971,6972,6973,6974,6975,6976,6977,6978,6982,6983,6985,  
22 6986,6987,6989,6990,6991,6992,6993,6994,6995,6996,7119,9185,9186,9187,9188,9191,919  
23 2,9232,9308,9381,9519,9641,9688,9689,9690,9691,9947,9948,9949,9950,9951,44,45,46,47,1  
24 314,1315,1316,1317,1318,1319,1320,1321,1322,1323,1324,1325,1327,1328,1329,1331,1333,  
25 1334,1336,1337,1339,1340,1341,1342,1343,1348,1349,1350,1351,1352,1353,1354,1355,136  
26 8,1369,1402,2721,2722,5019,5020,6588,6589,6590,6713,6714,6715,6770,7048,7059,7060,70  
27 61,7088,7089,7091,7092,7093,7094,7096,7115,9245,9247,9294,9355,9357,9370,9371,9372,9  
28 373,9374,9375,9376,9377,9378,9379,9391,9393,9463,9513,9515,9692,9693,9694,9695,9696,  
29 9698,9699,9700,9702,9703,9704,9705,9706,9707,9708,9709,9710,9711,9712,9713,9714,971  
30 7,9718,9720,9721,9722,9723,9724,9725,9726,9727,9728,9728,9730,9731,9732,9733,9734,97  
31 38,9739,9740,9832,9894,1090,1093,1097,1101,1102,1104,1106,1109,1111,1112,1115,1116,1  
32 602,1612,1613,1618,1626,1628,1633,1660,1664,1667,1667,1670,1671,1674,1783,1792,1826,  
33 1828,1829,1830,1831,1857,1858,1860,1865,1866,1868,1869,1870,1875,1876,1877,1878,187  
34 9,1880,1881,1882,1883,1884,1885,1886,1887,1888,1889,1893,1894,1927,1941,1949,1964,19  
35 65,1966,1968,1968,1971,1973,1974,1976,1978,1981,1982,1983,1984,1986,1987,1988,1990,1  
36 991,1992,1993,1994,1998,1999,2003,2004,2005,2006,2007,2008,2009,2011,2012,2013,2015,  
37 2016,2017,2018,2019,2020,2024,2025,2026,2027,2028,2031,2032,2033,2034,2066,2096,209  
38 7,2098,2759,6059,6061,6144,6541,6542,6547,6549,6550,6552,6553,6554,6555,6558,6561,65  
39 64,6565,6566,6567,6568,6570,6571,6582,6657,7022,7025,7067,9835,9836,9837

41 Figure S1. Probability (coloured contours) of the false negative rate (failing to correctly  
42 classify a declining population as at risk of extinction). Figures are (S1a) 30% decline, (S1b)  
43 50% decline, and (S1c) 80% decline in abundance, assuming density-independent dynamics,  
44 shown across a range of process noise (in SD units), lag-one autocorrelation in process noise,  
45 and observation error (in SD units; sigma in the upper right corner of each plot) given a 10-,  
46 20-, 40-, or 60-year observation window (panels a-d, respectively, within each of Figures S1a,  
47 S1b, and S1c). Open circles show empirically estimated autocorrelated process noise and  
48 observation error for different taxa based on time series from the Global Population Dynamics  
49 Database (see text).

50

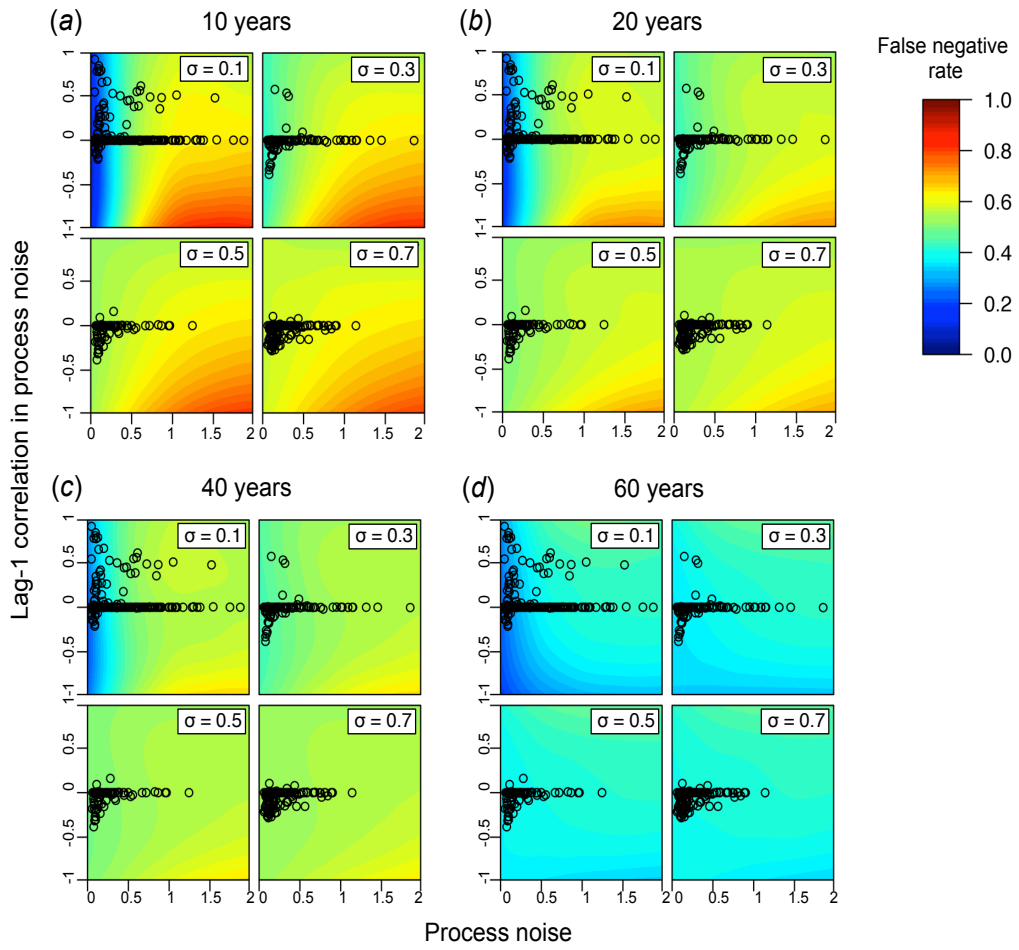

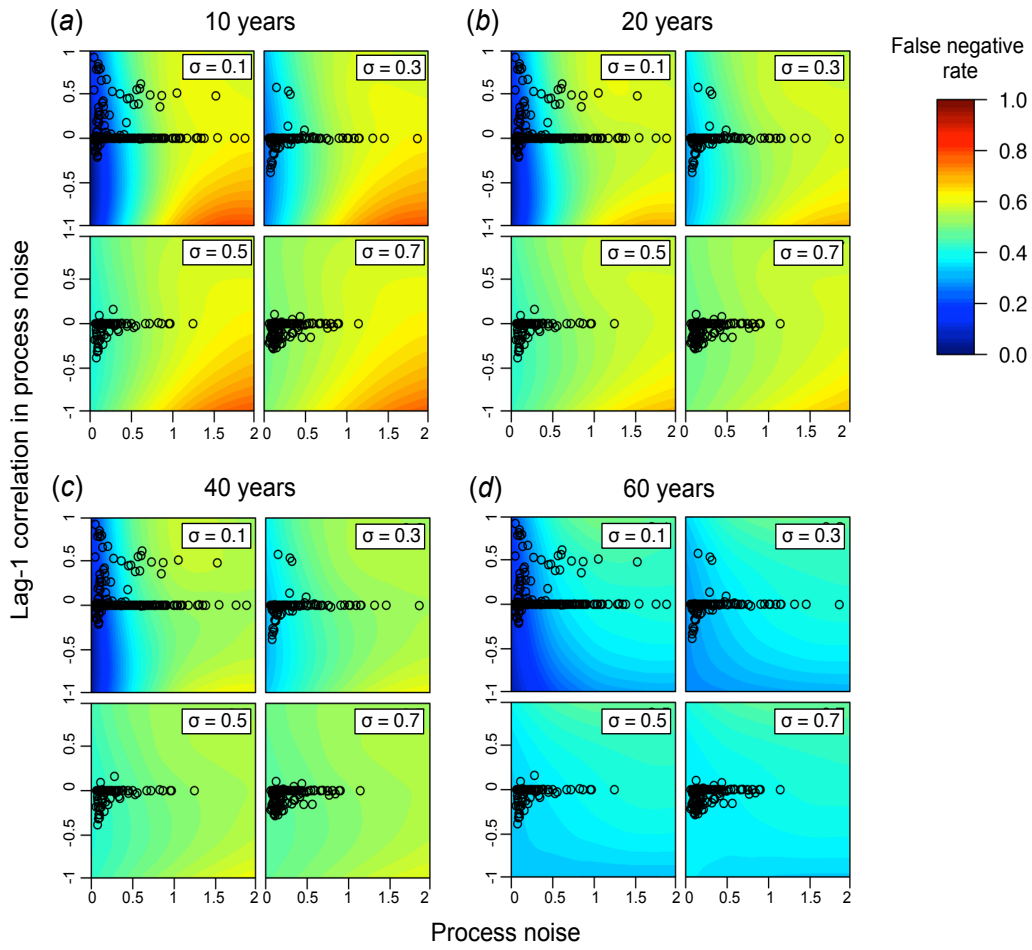

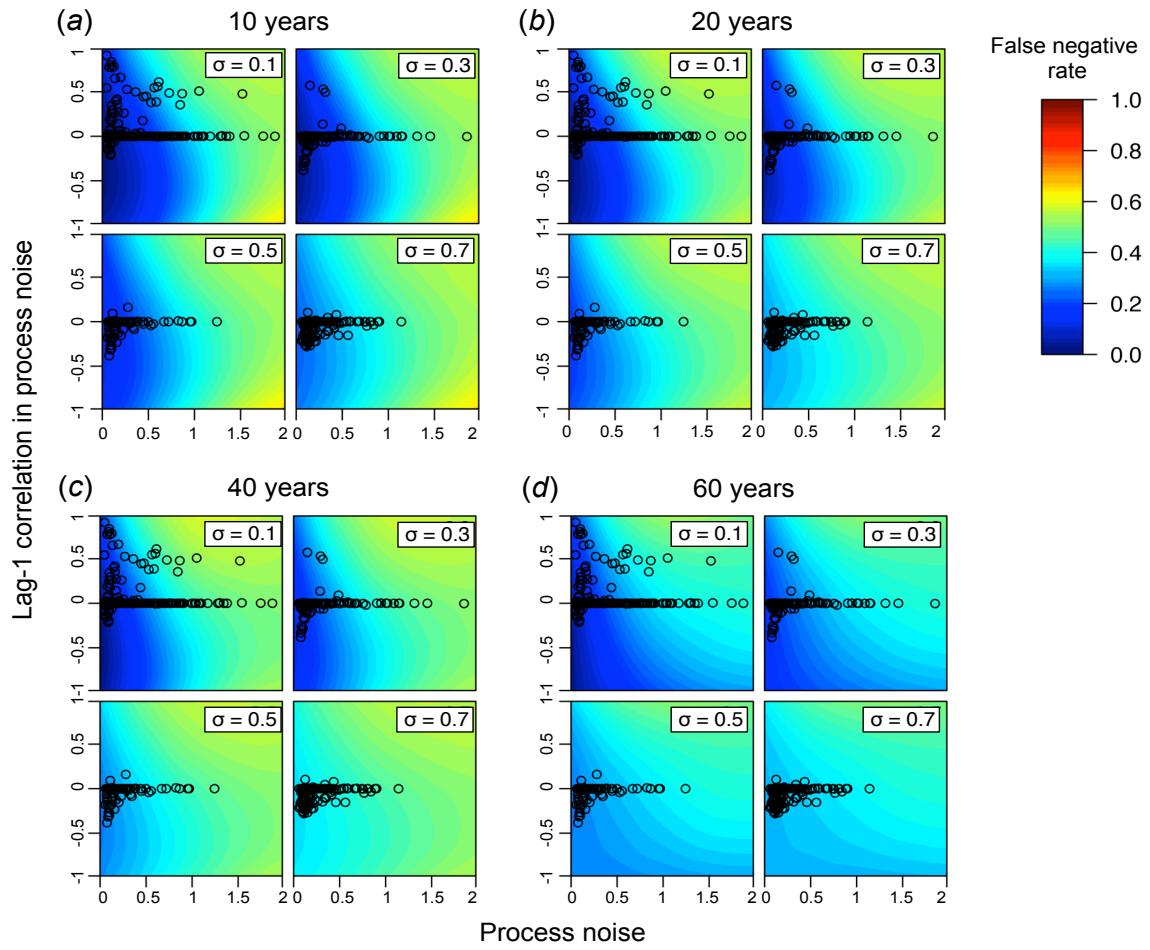

58 Figure S2. Probability (coloured contours) of false positive rate (falsely classifying a stable  
59 population as at risk of extinction) (i.e., greater than (S2a) 30% decline, (S2b) 50% decline,  
60 and (S2c) 80% decline in abundance), assuming density-dependent dynamics, across a range  
61 of process noise (in SD units), lag-one autocorrelation in process noise, and observation error  
62 (in SD units; sigma in the upper right corner of each plot) given a 10-, 20-, 40-, or 60-year  
63 observation window. Open circles show empirically estimated autocorrelated process noise  
64 and observation error based on time series from the Global Population Dynamics Database.

65

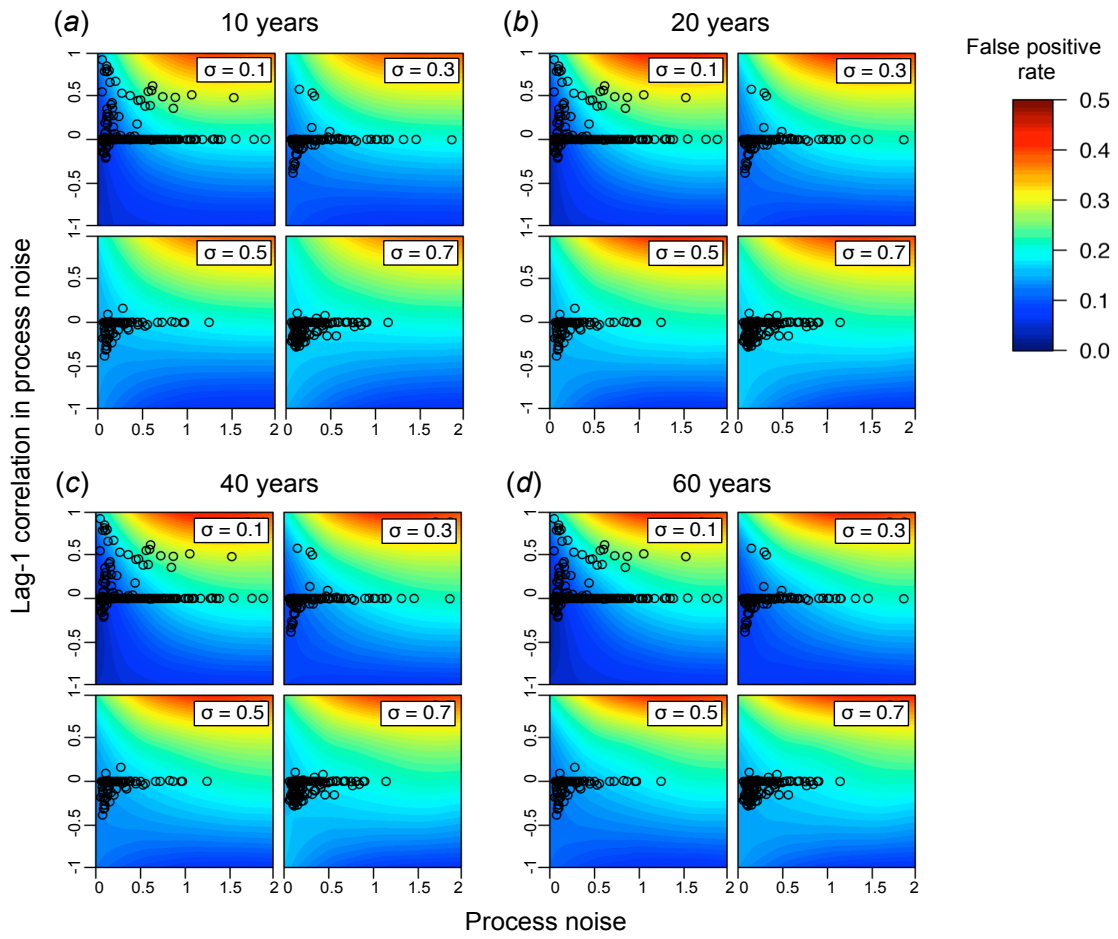

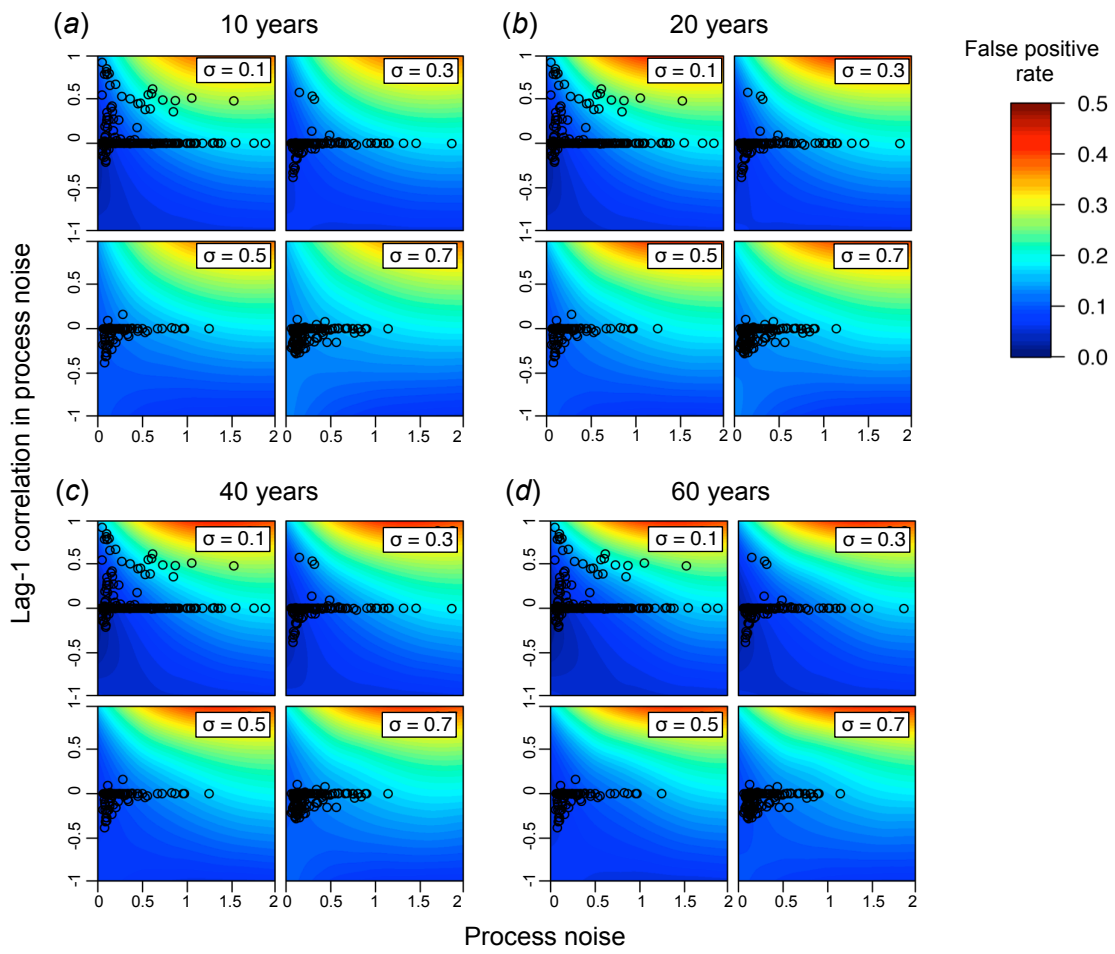



71 S2c. 80 percent decline threshold.

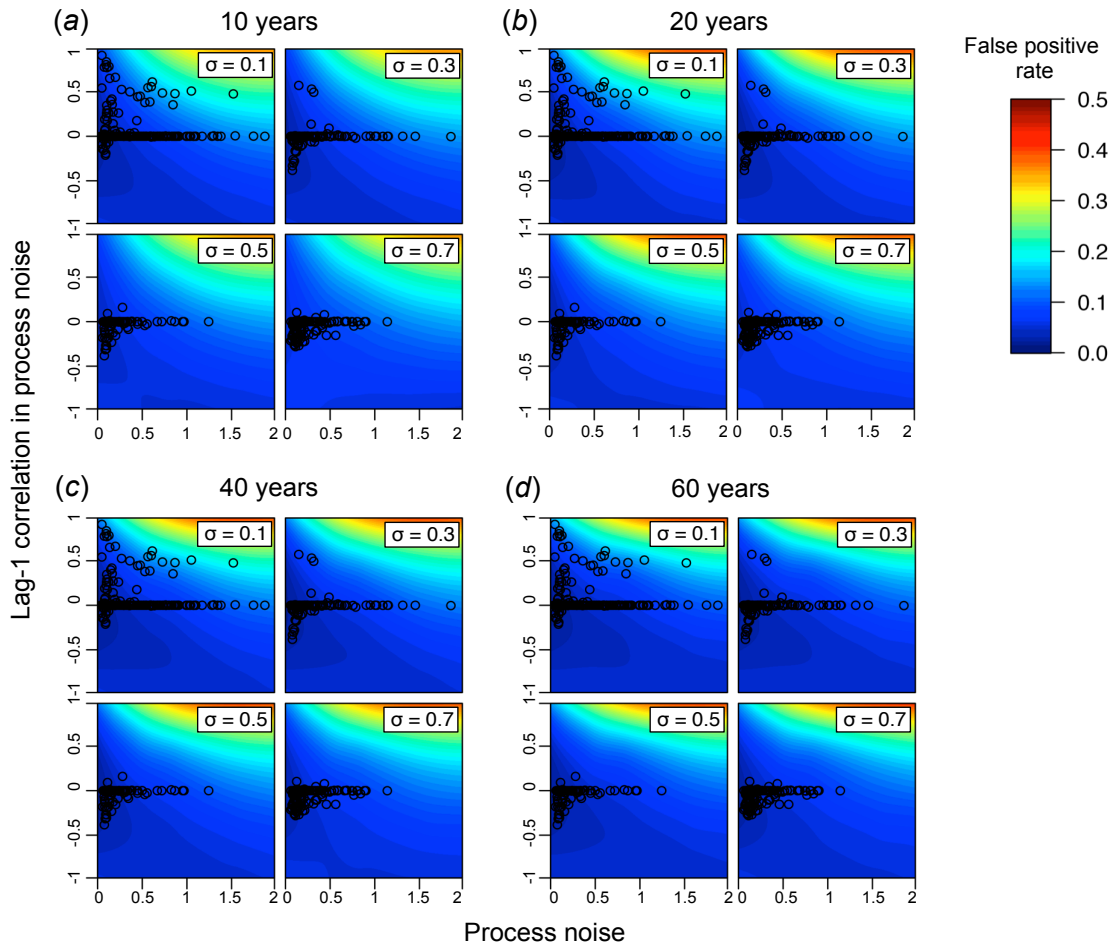

72  
73

74 Figure S3. (a) False positive rates based on simulated time series without density dependence  
 75 ( $b = 1$ ) and a population growth rate equal to 0 (see equation 1) across a range of observation  
 76 windows (time series length). Panels b and c are for the same conditions as panel a, except  
 77 they are for a 50% or 80% decline threshold, respectively. All panels are based on simulations  
 78 with observation error equal to 0.1

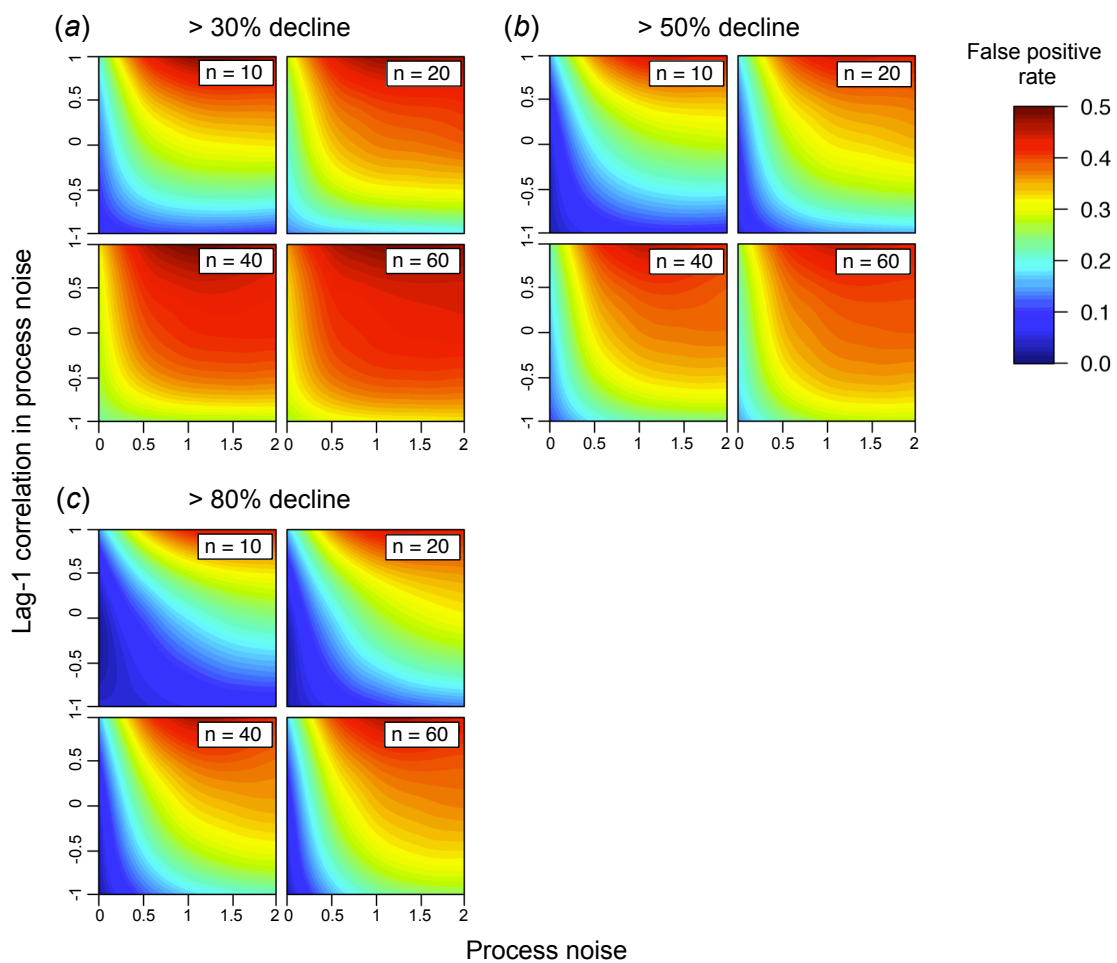

Supplement: rspb20132935supp1.pdf [file rspb20132935supp1.pdf]
